# Supplementary material for: Spatial patterns of mercury in biota of Adirondack, New York lakes
Source: PubMed Central journal article supplement — Ecotoxicology. 2011 Jun 21;20(7):1543–54. doi: 10.1007/s10646-011-0717-y (PMC3175042; doi:10.1007/s10646-011-0717-y), 2011-06-21
Supplement: 10646_2011_717_MOESM1_ESM.pdf [file 10646_2011_717_MOESM1_ESM.pdf]

**Supplemental materials for “Yu et al. (2011) Spatial patterns of mercury in biota of Adirondack, New York lakes. Ecotoxicology, manuscript submitted”. Affiliation for the corresponding author is Department of Civil and Environmental Engineering, Syracuse University and email is xuyu@syr.edu.**

Table 1 Mean concentrations of THg and MeHg in water, sediment (dry weight) and zooplankton (dry weight), and mean concentrations of THg in whole body and tail of crayfish, mean and standard deviation of fish (YPE) and loon (FLU) Hg concentrations. ND means no data

| Lake name           | Water<br>THg/MeHg<br>ng L <sup>-1</sup> | Sediment<br>THg/MeHg<br>ng g <sup>-1</sup> | Zooplankt<br>THg/MeHg<br>µg g <sup>-1</sup> | Crayfish<br>Whole/tail<br>µg g <sup>-1</sup> | Fish, YPE<br>mean ± std (n)<br>µg g <sup>-1</sup> | Loon, FLU<br>mean ± std (n)<br>µg g <sup>-1</sup> |
|---------------------|-----------------------------------------|--------------------------------------------|---------------------------------------------|----------------------------------------------|---------------------------------------------------|---------------------------------------------------|
| Lake Abanaukee      | 2.706/0                                 | 39.11/0.01                                 | 0.341/0.016                                 | 0.048/0.061                                  | 0.087 ± 0.031 (4)                                 | 0.509 ± 0.224 (5)                                 |
| Arbutus Lake        | 1.576/0.11                              | 5.11/0.11                                  | 0.187/ND                                    | 0.046/0.053                                  | 0.291 ± 0.059 (7)                                 | 1.412 ± 0.679 (8)                                 |
| Beaver Lake         | 1.751/0.084                             | 2.81/0.01                                  | 0.427/0.138                                 | 0.045/0.050                                  | 0.195 ± 0.110 (9)                                 | 1.793 ± 1.111 (16)                                |
| Big Moose Lake      | 1.036/0.03                              | 18.91/0.21                                 | 0.247/0.089                                 | 0.081/0.118                                  | 0.225 ± 0.022 (4)                                 | 1.893 ± 0.177 (3)                                 |
| Canada Lake         | 1.601/ND                                | ND/ND                                      | 0.007/ND                                    | 0.000/0.000                                  | 0.101 ± 0.061 (3)                                 | 1.986 ± 1.321 (7)                                 |
| Cedar River Flow    | 1.468/0.084                             | 3.51/0.01                                  | ND/ND                                       | 0.026/0.027                                  | 0.174 ± 0.000 (1)                                 | 0.685 ± 0.520 (3)                                 |
| Chaumont Pond       | 2.214/0.201                             | ND/ND                                      | ND/ND                                       | ND/ND                                        | 0.136 ± 0.045 (10)                                | 1.820 ± 0.440 (3)                                 |
| Clear Pond          | 0.096/0.012                             | ND/ND                                      | 0.221/0.041                                 | ND/ND                                        | 0.085 ± 0.000 (1)                                 | 0.566 ± 0.513 (4)                                 |
| Cranberry Lake      | 1.043/0                                 | ND/ND                                      | 0.413/0.057                                 | ND/ND                                        | 0.140 ± 0.067 (5)                                 | 2.070 ± 0.814 (14)                                |
| Dry Channel Pond    | 0.995/0.482                             | ND/ND                                      | 0.136/0.081                                 | ND/ND                                        | 0.114 ± 0.039 (6)                                 | 2.586 ± 0.633 (2)                                 |
| Lake Durant         | 3.413/0.056                             | 9.11/0.11                                  | 0.229/0.004                                 | 0.042/0.045                                  | 0.120 ± 0.047 (6)                                 | 1.210 ± 0.679 (9)                                 |
| East Pine Pond      | 3.181/0.302                             | ND/ND                                      | ND/ND                                       | ND/ND                                        | 0.137 ± 0.087 (4)                                 | 1.527 ± 0.407 (4)                                 |
| Ferris Lake         | 1.818/0                                 | 27.11/0.31                                 | 0.628/ND                                    | 0.094/0.165                                  | 0.360 ± 0.158 (4)                                 | 4.135 ± 1.638 (7)                                 |
| G Lake              | 1.036/0.126                             | ND/ND                                      | 0.268/0.173                                 | 0.024/0.026                                  | 0.234 ± 0.065 (4)                                 | 1.268 ± 1.091 (2)                                 |
| Garnet Lake         | 1.152/0.063                             | 45.21/0.11                                 | 0.310/0.066                                 | 0.029/0.031                                  | 0.098 ± 0.048 (4)                                 | 2.093 ± 0.738 (3)                                 |
| Henderson Lake      | 1.54/0.181                              | 64.21/1.31                                 | 0.393/0.161                                 | 0.069/0.091                                  | 0.320 ± 0.043 (3)                                 | 2.039 ± 0.681 (3)                                 |
| Hitchins Pond       | 1.189/0.038                             | ND/ND                                      | 0.447/0.158                                 | ND/ND                                        | 0.140 ± 0.078 (4)                                 | 1.329 ± 0.789 (5)                                 |
| Horseshoe Lake      | 1.449/0                                 | 3.11/0.31                                  | 0.098/0.056                                 | 0.024/0.025                                  | 0.130 ± 0.085 (5)                                 | 0.310 ± 0.161 (2)                                 |
| Kushaqua Lake       | 2.495/0.118                             | 3.71/0.01                                  | 0.156/0.066                                 | 0.026/0.028                                  | 0.129 ± 0.054 (5)                                 | 0.894 ± 0.262 (2)                                 |
| Limekiln Lake       | 0.555/0.006                             | ND/ND                                      | 0.226/0.028                                 | ND/ND                                        | 0.147 ± 0.065 (4)                                 | 0.752 ± 0.475 (10)                                |
| Little Clear Pond   | 2.244/0.01                              | 11.61/0.01                                 | 0.142/0.018                                 | 0.045/0.050                                  | 0.142 ± 0.067 (5)                                 | 0.577 ± 0.359 (13)                                |
| Little Safford Lake | 3.164/0.322                             | ND/ND                                      | 0.520/0.059                                 | ND/ND                                        | 0.184 ± 0.025 (3)                                 | 0.799 ± 0.714 (5)                                 |
| Long Pond           | 4.64/0.321                              | ND/ND                                      | 0.056/0.026                                 | ND/ND                                        | 0.117 ± 0.032 (5)                                 | 1.471 ± 0.919 (11)                                |
| Lows Lake           | 2.396/0                                 | ND/ND                                      | 0.194/0.077                                 | ND/ND                                        | 0.110 ± 0.024 (4)                                 | 1.589 ± 0.807 (13)                                |
| Mason Lake          | 1.525/0.208                             | 88.11/3.61                                 | 0.496/0.054                                 | 0.058/0.071                                  | 0.083 ± 0.028 (4)                                 | 1.382 ± 0.680 (4)                                 |
| Massawepie Lake     | 1.114/0.208                             | ND/ND                                      | 0.236/0.043                                 | ND/ND                                        | 0.061 ± 0.019 (4)                                 | 0.846 ± 0.125 (3)                                 |
| Middle Saranac Lake | 1.395/0.061                             | 2.41/0.41                                  | 0.309/0.023                                 | 0.021/0.023                                  | 0.058 ± 0.018 (4)                                 | 0.641 ± 0.480 (7)                                 |
| Moshier Reservoir   | 2.113/0.12                              | ND/ND                                      | 0.551/0.193                                 | ND/ND                                        | 0.207 ± 0.068 (6)                                 | 2.601 ± 0.723 (6)                                 |
| Moss Lake           | ND/ND                                   | 1.71/0.01                                  | 0.305/0.089                                 | 0.043/0.048                                  | 0.147 ± 0.115 (4)                                 | 1.683 ± 0.644 (9)                                 |
| Newton Falls        | 1.645/0.129                             | 14.11/0.21                                 | 0.319/0.058                                 | 0.061/0.076                                  | 0.146 ± 0.045 (5)                                 | 1.512 ± 0.406 (4)                                 |
| Nicks Lake          | 1.231/0.083                             | ND/ND                                      | 0.203/0.026                                 | ND/ND                                        | 0.108 ± 0.022 (7)                                 | 1.366 ± 0.985 (7)                                 |
| North Lake          | 3.78/0.17                               | 11.41/0.21                                 | 0.820/0.217                                 | 0.070/0.094                                  | 0.337 ± 0.096 (6)                                 | 3.134 ± 0.611 (3)                                 |
| Piercefield Flow    | 1.87/0.12                               | ND/ND                                      | 0.218/0.010                                 | ND/ND                                        | 0.116 ± 0.061 (8)                                 | 0.599 ± 0.251 (2)                                 |
| Piseco Lake-Big Bay | 1.057/0.121                             | 8.61/0.11                                  | 0.213/ND                                    | 0.021/0.023                                  | 0.102 ± 0.005 (2)                                 | 1.085 ± 0.571 (7)                                 |
| Private Lake #1     | 3.018/0.03                              | 18.91/1.81                                 | ND/ND                                       | 0.079/0.118                                  | 0.104 ± 0.017 (3)                                 | 2.570 ± 0.113 (2)                                 |
| Round Lake          | 1.891/0.015                             | 22.21/0.21                                 | 0.236/0.039                                 | 0.054/0.064                                  | 0.051 ± 0.025 (2)                                 | 1.250 ± 1.018 (2)                                 |

|               |             |           |             |             |                   |                   |
|---------------|-------------|-----------|-------------|-------------|-------------------|-------------------|
| Seventh Lake  | 1.197/0.002 | ND/ND     | 0.176/0.029 | ND/ND       | 0.127 ± 0.039 (4) | 0.535 ± 0.151 (5) |
| South Lake    | 1.119/0.012 | 8.31/0.11 | 0.533/0.094 | 0.055/0.066 | 0.321 ± 0.148 (6) | 1.117 ± 0.567 (8) |
| South Pond    | 1.342/0.038 | 7.31/0.11 | 0.337/0.040 | 0.044/0.049 | 0.200 ± 0.096 (5) | 2.411 ± 0.426 (2) |
| Spitfire Lake | 0.614/0.018 | ND/ND     | 0.173/0.006 | ND/ND       | 0.071 ± 0.047 (4) | 0.748 ± 0.543 (6) |
| Squaw Lake    | 1.804/0.159 | ND/ND     | 0.245/0.182 | ND/ND       | 0.470 ± 0.070 (2) | 1.357 ± 0.965 (4) |
| Taylor Pond   | 0.713/0.07  | 2.71/0.01 | 0.213/0.017 | 0.030/0.035 | 0.114 ± 0.041 (5) | 1.252 ± 0.922 (3) |
| Wolf Pond     | 0.649/0.03  | 2.51/0.01 | 0.271/0.040 | 0.039/0.043 | 0.174 ± 0.066 (6) | 0.955 ± 0.576 (8) |
| Woodruff Lake | 1.728/0.062 | ND/ND     | 0.655/0.055 | 0.037/0.040 | 0.096 ± 0.051 (4) | 0.848 ± 0.258 (3) |

### Quality assurance of sample analysis

An initial calibration was performed before every sample analysis of THg, MeHg and chemical variables. Initial calibration verification (ICV, immediately after initial calibration), initial calibration blank (ICB, after ICV), continuing calibration verification (CCV, after every 10 samples and at the end of the run), continuing calibration blank (CCB, after every CCV), quality control sample (QCS), laboratory control sample (LCS, both QCS and LCS were immediately after initial calibration), method blank (immediately after QCS and every 10 samples), matrix spike/matrix spike duplicate sample (MS/MSD, 1 with every batch of 10 samples), sample duplicate (1 every 20 samples), and ongoing precision and recovery (OPR, 1 at the beginning and end of every batch) sample, were used to maintain the analytical quality assurance and instrument performance and stability.

Recoveries for spikes and standards in determining Hg concentrations were well controlled within method guidelines (75-119% on QCS and LCS, 77-111% on MS/MSD, and 76-121% on OPR for THg and MeHg; 90-110% on CCV for THg; and 85-115% on CCV for MeHg), while the relative percent differences for duplicates were controlled at less than 20%. Field and method blanks were controlled at less than 3 times method detection limit (MDL). MDLs for THg in water, sediment and zooplankton were 0.2 ng

$L^{-1}$ ,  $1 \text{ ng g}^{-1}$ , and  $0.033 \text{ } \mu\text{g g}^{-1}$ , respectively; while MDLs for MeHg were  $0.02 \text{ ng L}^{-1}$ ,  $0.002 \text{ ng g}^{-1}$ , and  $0.0001 \text{ } \mu\text{g g}^{-1}$ , respectively.
